# Supplementary material
Source: publisher figshare collection journal article supplement (https://karger.figshare.com/articles/dataset/_/5126470)
Supplement: Supplementary file 1 [file 1]

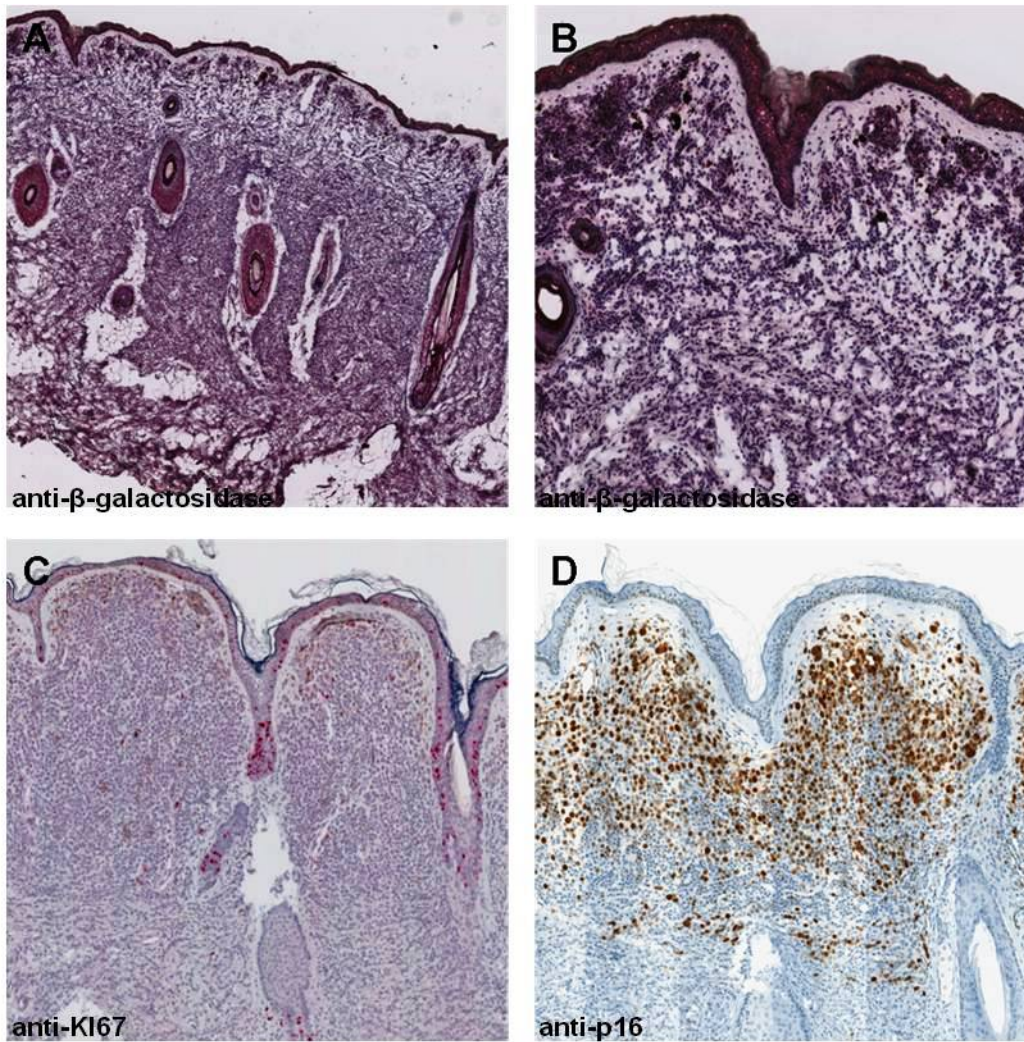

### Supplementary Figure Legend

**Suppl Figure 1.** Anti-beta-galactosidase (A and B), anti-Ki67 (C), and p16 (D) staining of a CMN tissue with predominantly dermal affection, deriving from the shoulder of a 7.6-year-old boy. Mark the co-localization of beta-galactosidase staining and p16 (A, B, D) with absence of Ki67 (C) in the dermis.
