# Supplementary material
Source: publisher figshare collection journal article supplement (https://karger.figshare.com/articles/dataset/_/5126470)
Supplement: Supplementary file 2 [file 1]

**Table 1.** Patients Demographics and BRAF and NRAS Mutation Status

| Pt. | Age at excision | Sex | Localization | Max. diameter [cm] | Diagnosis       | Classification [45] | NRAS | BRAF  | Cell culture |
|-----|-----------------|-----|--------------|--------------------|-----------------|---------------------|------|-------|--------------|
| 1   | 0.5             | F   | Trunk        | 14                 | CMN             | L2                  | Q61K | wt    | FE08         |
| 2   | 0.6             | F   | Arm          | 6                  | CMN             | M2                  | Q61K | wt    |              |
| 3   | 0.6             | F   | Trunk        | 30                 | CMN             | G2                  | Q61K | wt    |              |
| 4   | 0.6             | F   | Leg          | 5                  | CMN             | M2                  | Q61K | wt    |              |
| 5   | 0.6             | F   | Head         | 3                  | CMN             | M1                  | Q61K | wt    |              |
| 6   | 0.8             | F   | Arm          | 6                  | CMN             | M2                  | NA   | wt    | LJ08         |
| 7   | 1.2             | M   | Head         | 15                 | CMN             | L1                  | Q61K | wt    |              |
| 8   | 1.6             | F   | Head         | 4                  | CMN             | M1                  | NA   | wt    | ZM07         |
| 9   | 1.9             | F   | Trunk        | 18                 | CMN             | L2                  | NA   | wt    | SC06         |
| 10  | 3.2             | M   | Arm          | 11                 | CMN             | L1                  | Q61K | wt    |              |
| 11  | 3.7             | M   | Head         | 12                 | CMN             | L2                  | wt   | wt    |              |
| 12  | 7.6             | M   | Trunk        | 12                 | CMN (Pseudo-ME) | L1                  | NA   | V600E |              |
| 13  | 11.8            | M   | Head         | 2                  | CMN             | M1                  | Q61K | wt    |              |
| 14  | 18.5            | M   | Trunk        | 5                  | CMN             | M1                  | Q61K | wt    |              |
| 15  | 30.3            | W   | Leg          | 2.5                | CMN             | M1                  | Q61K | wt    |              |
| 16  | 74.3            | M   | Head         | 7                  | CMN             | M1                  | Q61K | wt    | SW34         |

NA: not available (due to low quality of DNA). Cultured CMNs are highlighted yellow  
ME: melanoma

**Table 2. Grade Of Immunoreactivity In Different Nevi Groups, Melanoma And Primary Melanoma Metastases**

|                   | CMN   |      | Cong. P. |      | MN    |       | MN>70 y |      | M in MN |       | MN arnd. M |      | M Meta. |      |
|-------------------|-------|------|----------|------|-------|-------|---------|------|---------|-------|------------|------|---------|------|
|                   | Mean  | SD   | Mean     | SD   | Mean  | SD    | Mean    | SD   | Mean    | SD    | Mean       | SD   | Mean    | SD   |
| MelanA [%]        | 80.6  | 11.3 | 57.5     | 30.1 | 49.0  | 24.2  | 43.8    | 19.2 | 60.0    | 10.0  | 30.0       | 20.0 | 78.3    | 18.9 |
| MelanA [grade*%]  | 192.5 | 54.5 | 101.1    | 83.6 | 84.0  | 68.3  | 103.8   | 63.2 | 180.0   | 30.0  | 73.3       | 71.0 | 190.0   | 59.4 |
| HMB45 [%]         | 33.8  | 21.8 | 25.6     | 22.3 | 42.0  | 30.4  | 6.9     | 13.5 | 63.3    | 5.8   | 6.7        | 2.9  | 88.3    | 7.6  |
| HMB45 [grade*%]   | 73.1  | 56.5 | 30.6     | 28.1 | 68.0  | 60.1  | 6.9     | 13.5 | 190.0   | 17.3  | 11.7       | 7.6  | 238.3   | 68.5 |
| MITF [%]          | 75.0  | 22.6 | 88.0     | 17.9 | 67.2  | 35.6  | 60.0    | 20.7 |         |       |            |      |         |      |
| MITF [%]*         | 200.6 | 77.8 | 252.0    | 78.2 | 177.2 | 125.9 | 166.3   | 78.9 |         |       |            |      |         |      |
| Ki67 D [%]        | 1.2   | 1.2  | 0.5      | 0.5  | 0.3   | 0.5   | 0.0     | 0.0  | 8.3     | 2.9   | 0.3        | 0.6  | 21.7    | 20.2 |
| Ki67 D [grade*%]  | 1.7   | 2.2  | 0.9      | 1.0  | 0.4   | 0.8   | 0.0     | 0.0  | 15.0    | 8.7   | 0.7        | 1.2  | 58.3    | 66.4 |
| p16 D [%]         | 31.4  | 17.9 | 42.5     | 21.2 | 14.3  | 20.0  | 17.5    | 17.7 | 1.0     | 0.0   | 40.0       | 0.0  | 0.0     | 0.0  |
| p16 D [grade*%]   | 78.2  | 54.8 | 98.8     | 77.0 | 42.0  | 60.5  | 35.0    | 35.4 | 2.0     | 0.0   | 93.3       | 23.1 | 0.0     | 0.0  |
| β-gal D [%]       | 34.0  | 19.5 | 8.0      | 18.1 | 20.2  | 23.1  | 7.5     | 11.3 |         |       |            |      |         |      |
| β-gal D [grade*%] | 60.0  | 40.0 | 31.8     | 49.0 | 33.8  | 44.9  | 7.5     | 11.3 |         |       |            |      |         |      |
| CD271 D[%]        | 55.3  | 19.3 | 54.4     | 26.1 | 65.0  | 12.2  | 32.5    | 10.6 | 66.7    | 5.8   | 50.0       | 10.0 | 86.7    | 15.3 |
| CD271 D [grade*%] | 136.9 | 60.7 | 123.8    | 92.4 | 131.4 | 73.6  | 65.0    | 21.2 | 200.0   | 17.3  | 100.0      | 20.0 | 260.0   | 48.8 |
| SOX10 D[%]        | 82.5  | 8.6  | 72.5     | 14.9 | 59.0  | 24.9  | 35.0    | 35.4 | 70.0    | 26.5  | 66.7       | 5.8  | 56.7    | 49.3 |
| SOX10 D [grade*%] | 223.8 | 53.5 | 175.0    | 61.4 | 121.1 | 78.2  | 70.0    | 70.7 | 196.7   | 102.1 | 200.0      | 17.3 | 113.3   | 98.7 |
| pERK [%]          | 10.0  | 14.1 | 2.4      | 2.5  | 16.3  | 16.5  | 1.8     | 1.9  | 23.2    | 25.7  | 1.0        | 0.0  | 65.0    | 16.6 |
| pERK [grade*%]    | 23.0  | 27.1 | 5.2      | 5.1  | 32.5  | 33.0  | 4.8     | 6.0  | 54.4    | 60.3  | 1.6        | 0.6  | 163.0   | 77.8 |

CMN: Congenital melanocytic nevus. Con. P.: melanocytic nevus with congenital pattern. MN: melanocytic nevus. MN: melanocytic nevus of patients over 70 years. M in MN: melanoma in melanocytic nevus. MN arnd. M: melanocytic nevus around melanoma. M Meta: melanoma metastasis. Grade is calculated by multiplying the percentage of immunoreactive cells with the expression intensity (1 - low, 3 - strong). [%] indicates percentage of immunoreactive cells within the lesion
